# Supplementary material
Source: PubMed Central journal article supplement (PMC2753668)
Supplement: NIHMS116198-supplement-01.pdf [file NIHMS116198-supplement-01.pdf]

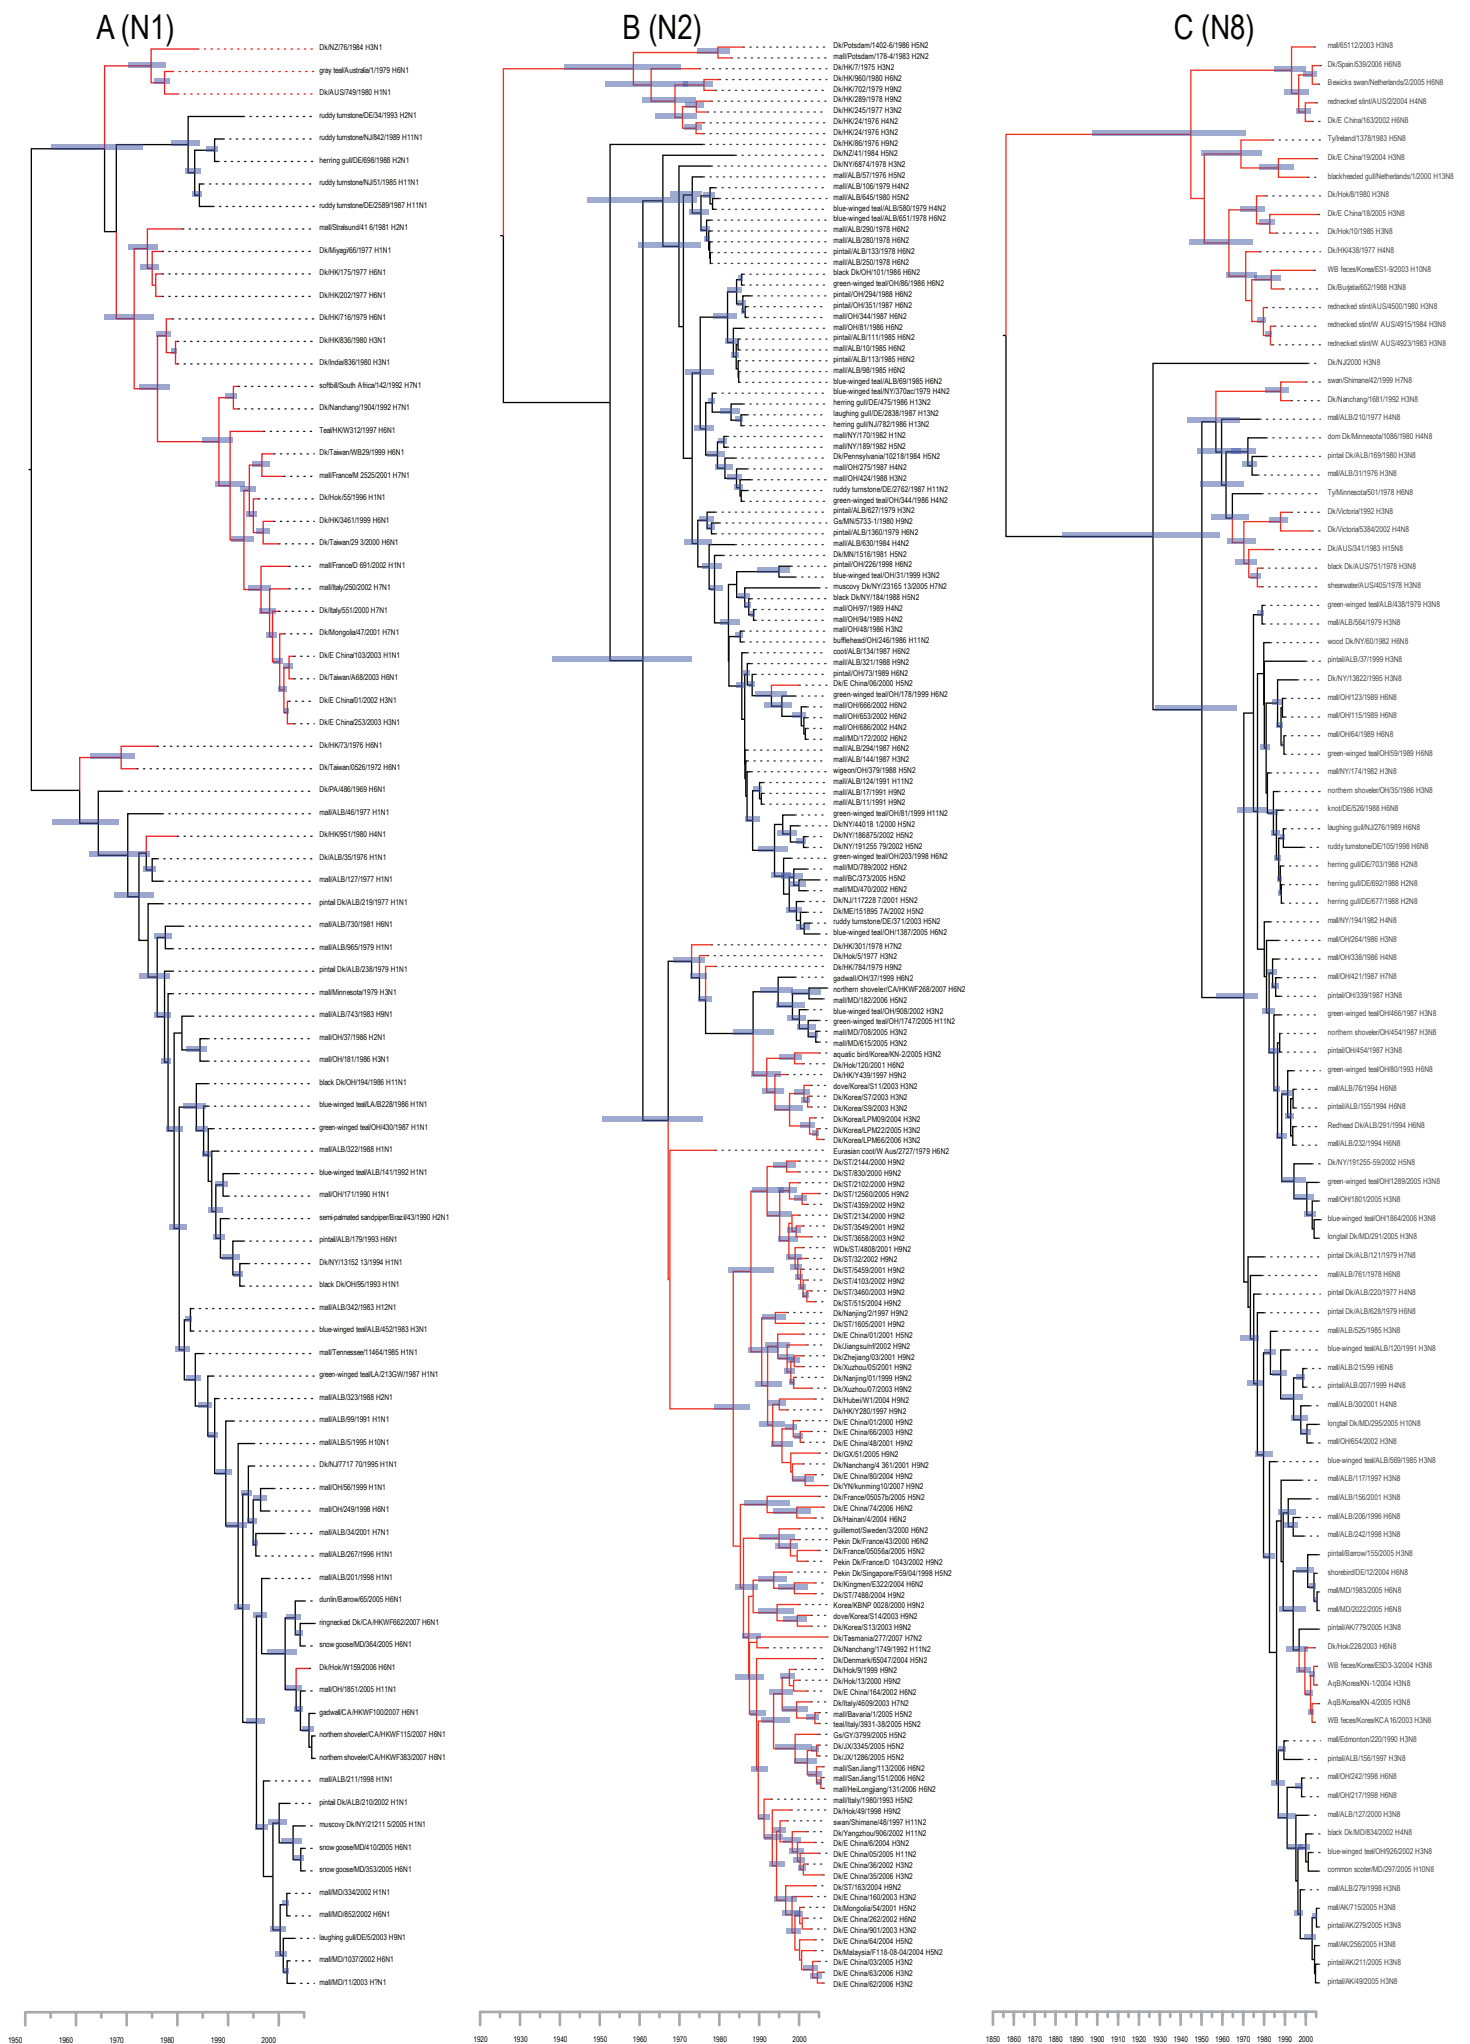

**Figure S1.** Dated phylogenies of the N1 (A) N2, (B) and N8 (C) genes isolated from both Eurasia (red) and North America (black) Node bars indicate 95% HPD of divergence times. Scale bar shows timeline in years.

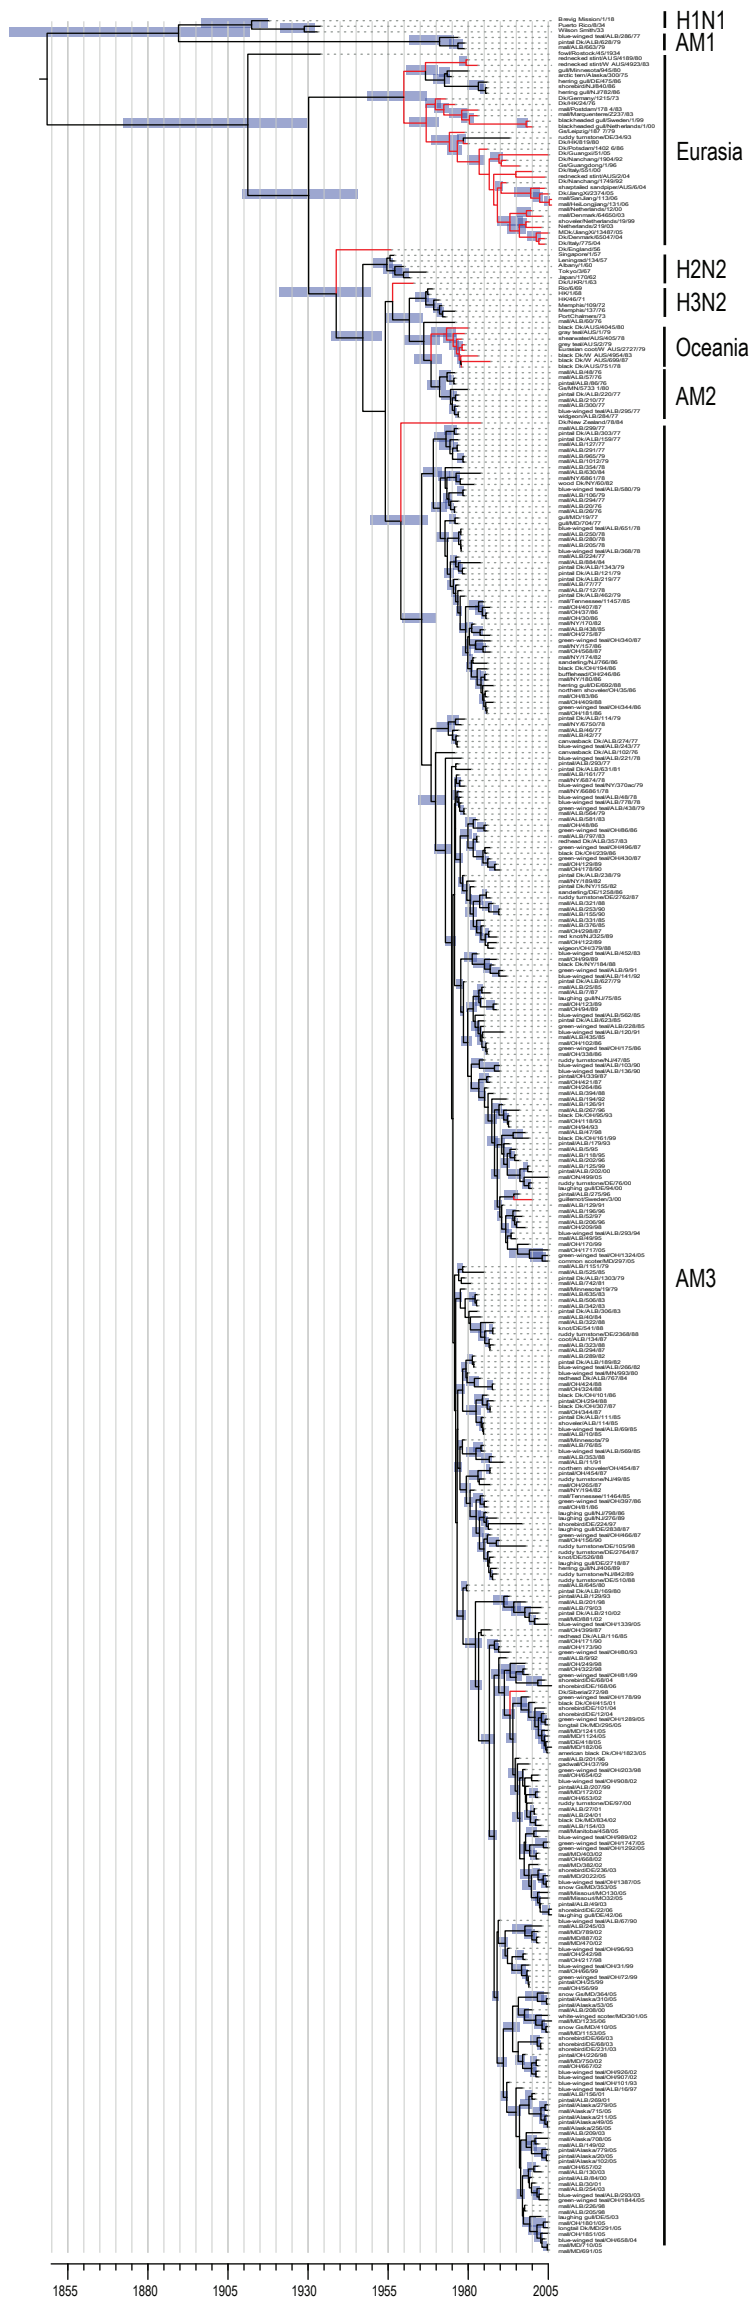

**Figure S2.** Dated phylogeny of the PB1 gene isolated from both Eurasia (red) and North America (black) Node bars indicate 95% HPD of divergence times. Scale bar shows timeline in years.

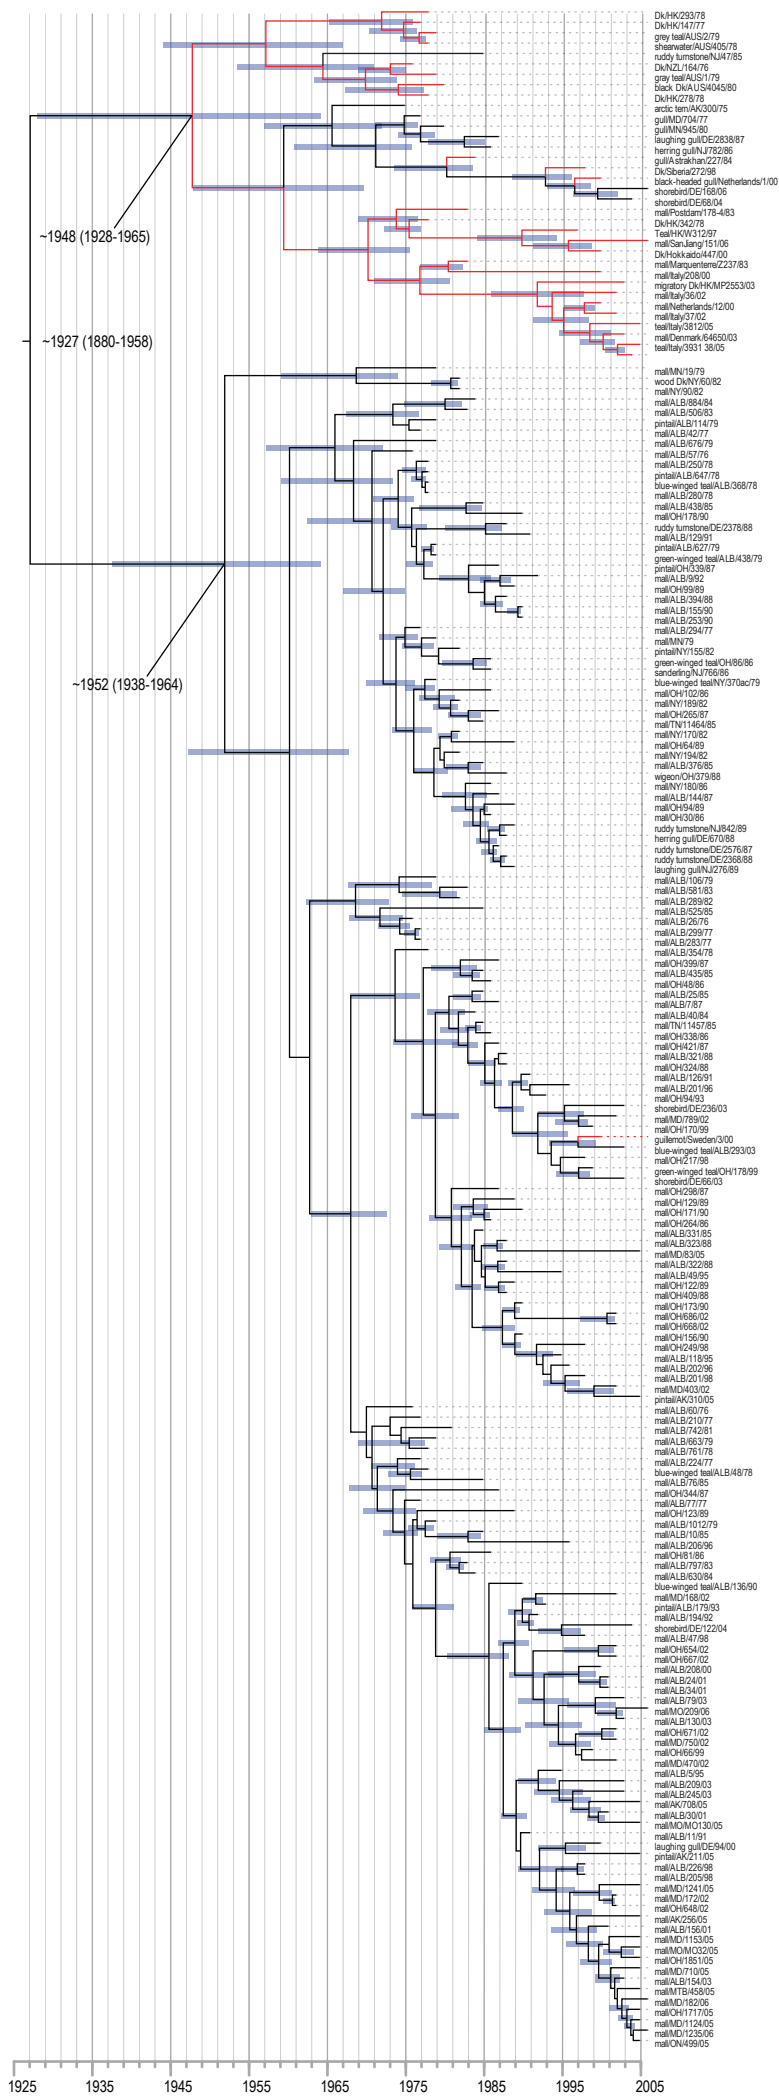

**Figure S3.** Dated phylogeny of the PB2 gene isolated from both Eurasia (red) and North America (black) Node bars indicate 95% HPD of divergence times. Scale bar shows timeline in years.

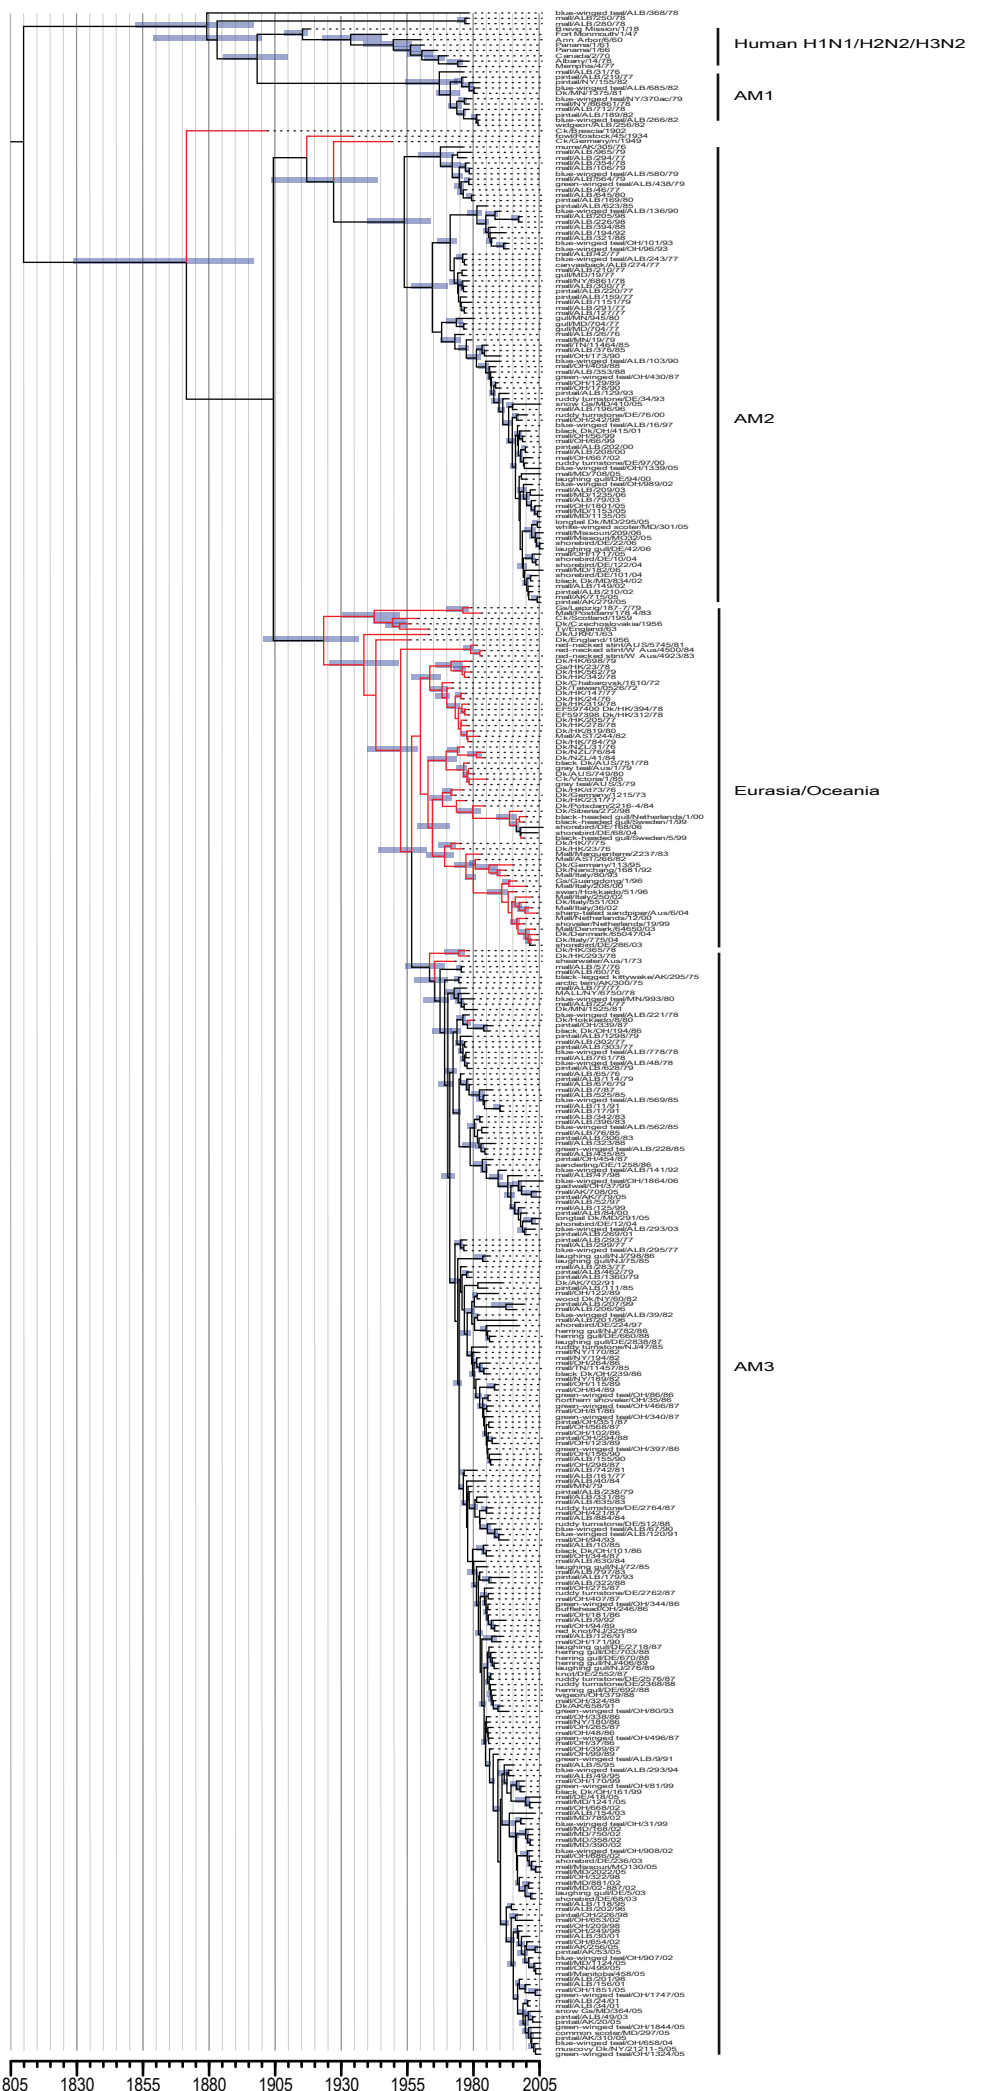

**Figure S4.** Dated phylogeny of the PA gene isolated from both Eurasia (red) and North America (black) Node bars indicate 95% HPD of divergence times. Scale bar shows timeline in years.

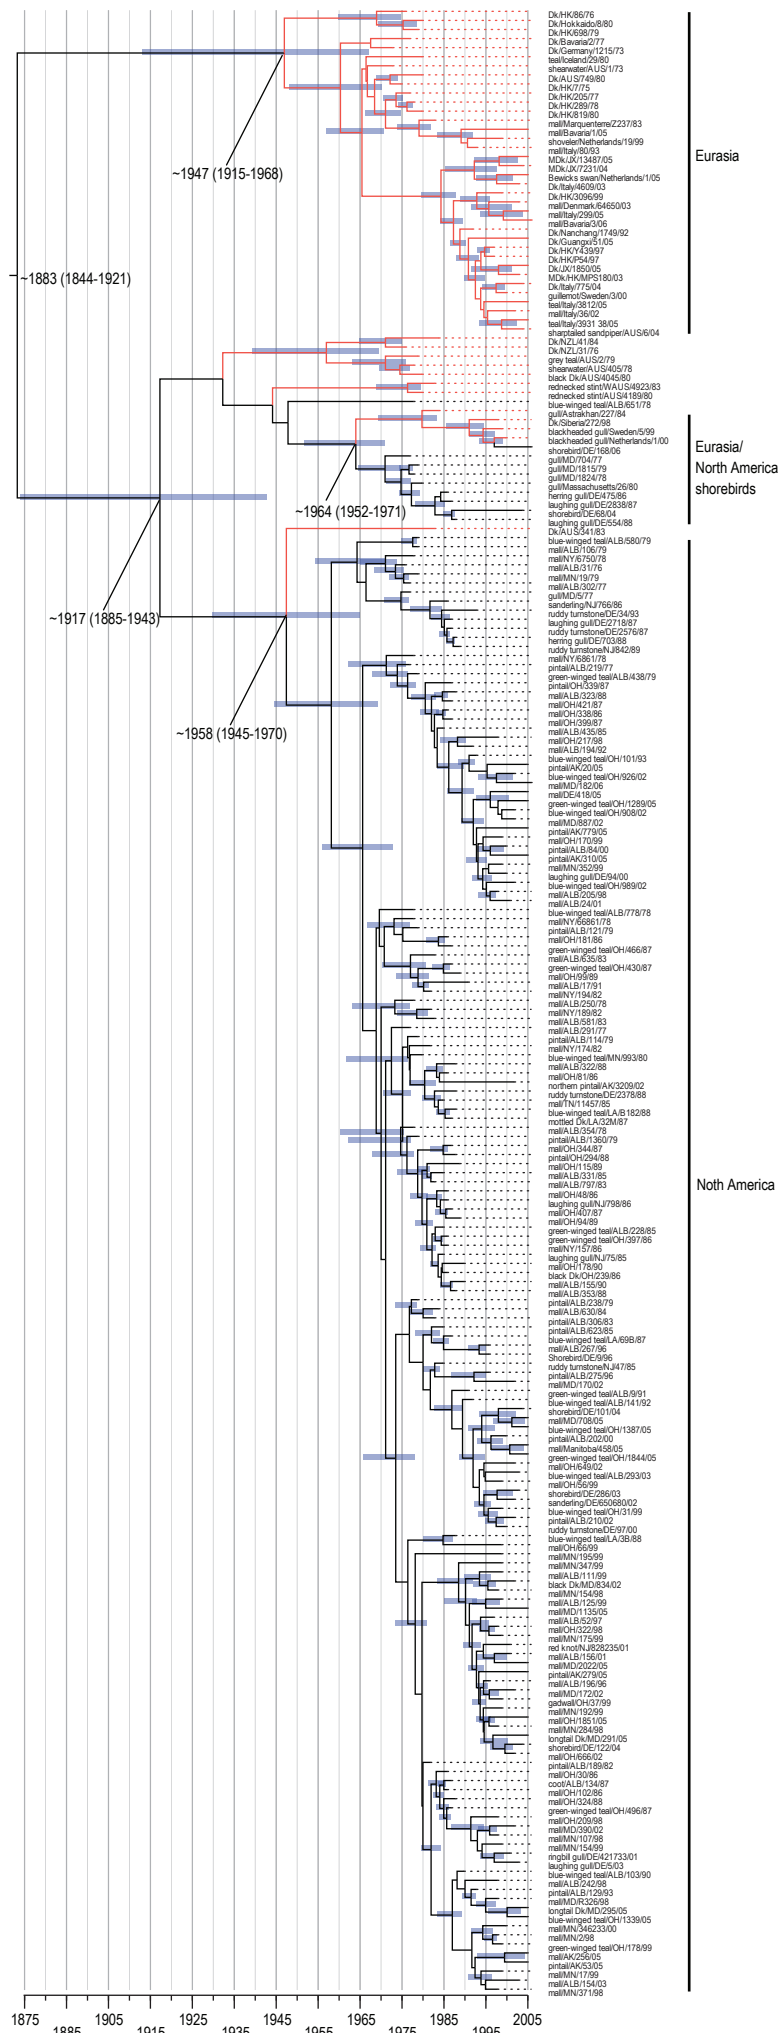

**Figure S5.** Dated phylogeny of the NP gene isolated from both Eurasia (red) and North America (black) Node bars indicate 95% HPD of divergence times. Scale bar shows timeline in years.

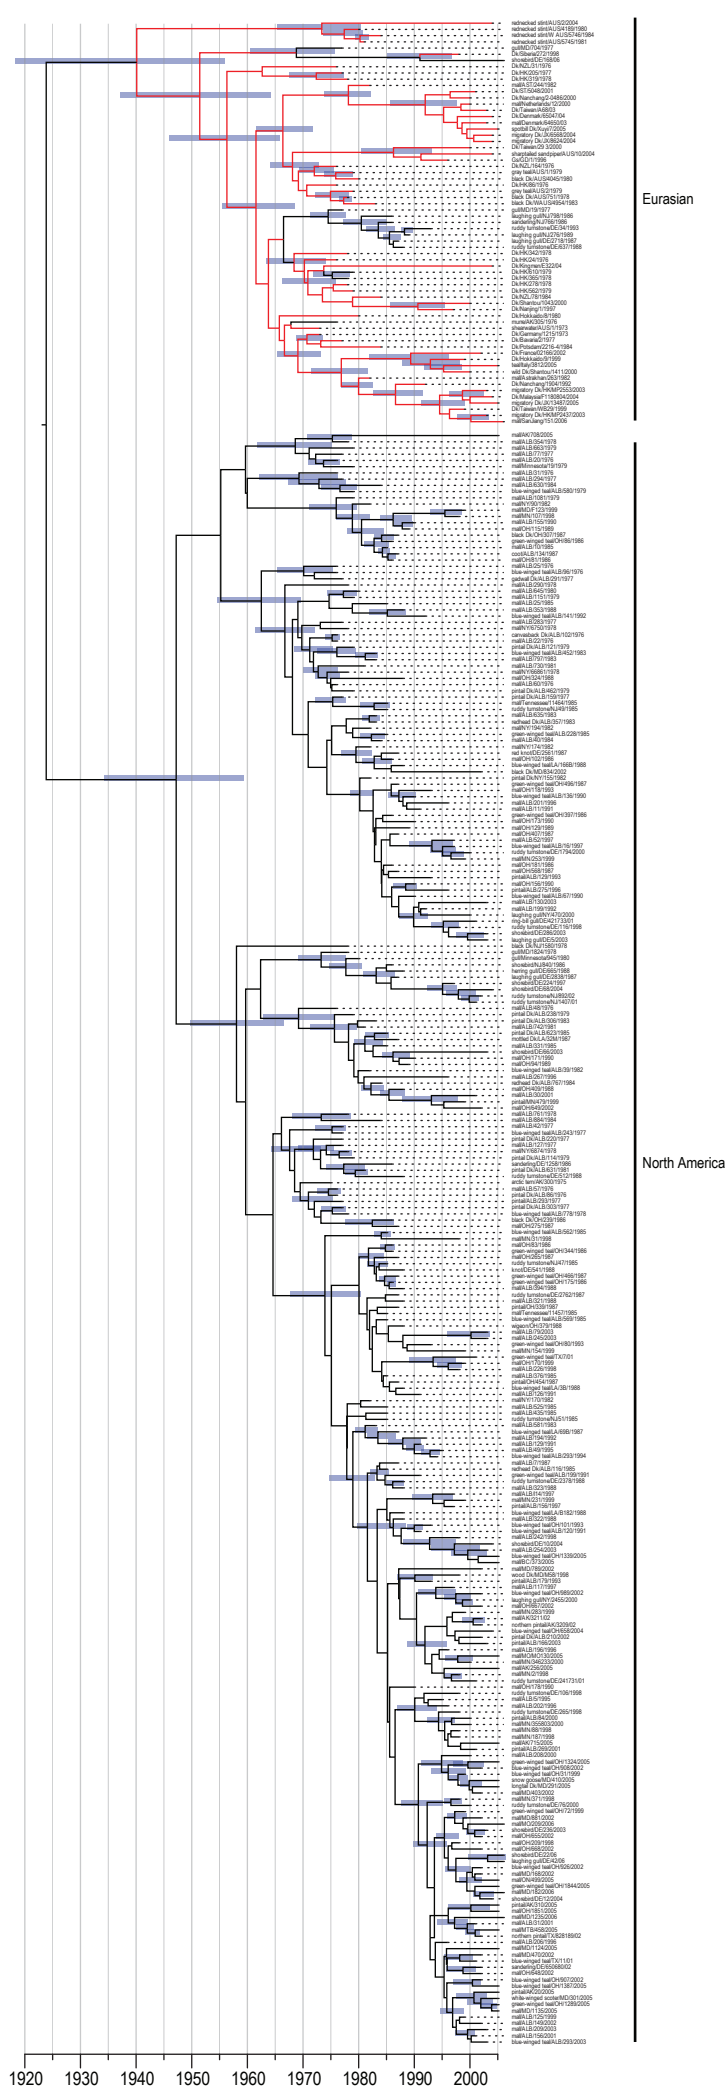

**Figure S6.** Dated phylogeny of the M gene isolated from both Eurasia (red) and North America (black) Node bars indicate 95% HPD of divergence times. Scale bar shows timeline in years.



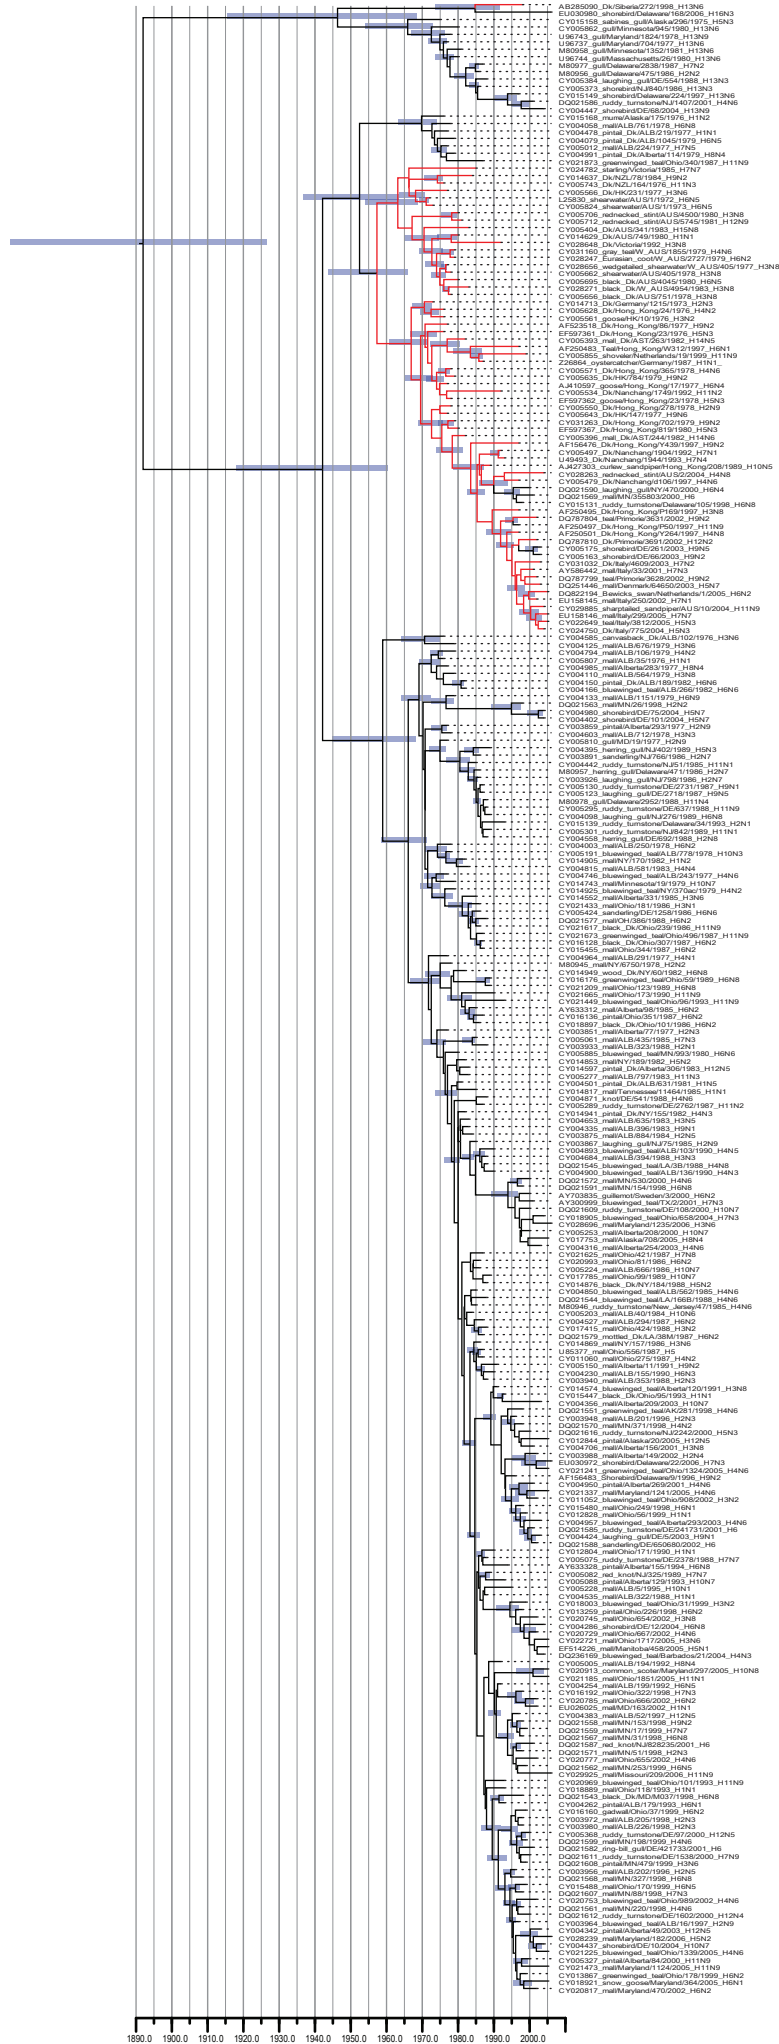

**Figure S7.** Dated phylogeny of the NS Allele A gene isolated from both Eurasia (red) and North America (black) Node bars indicate 95% HPD of divergence times. Scale bar shows timeline in years.

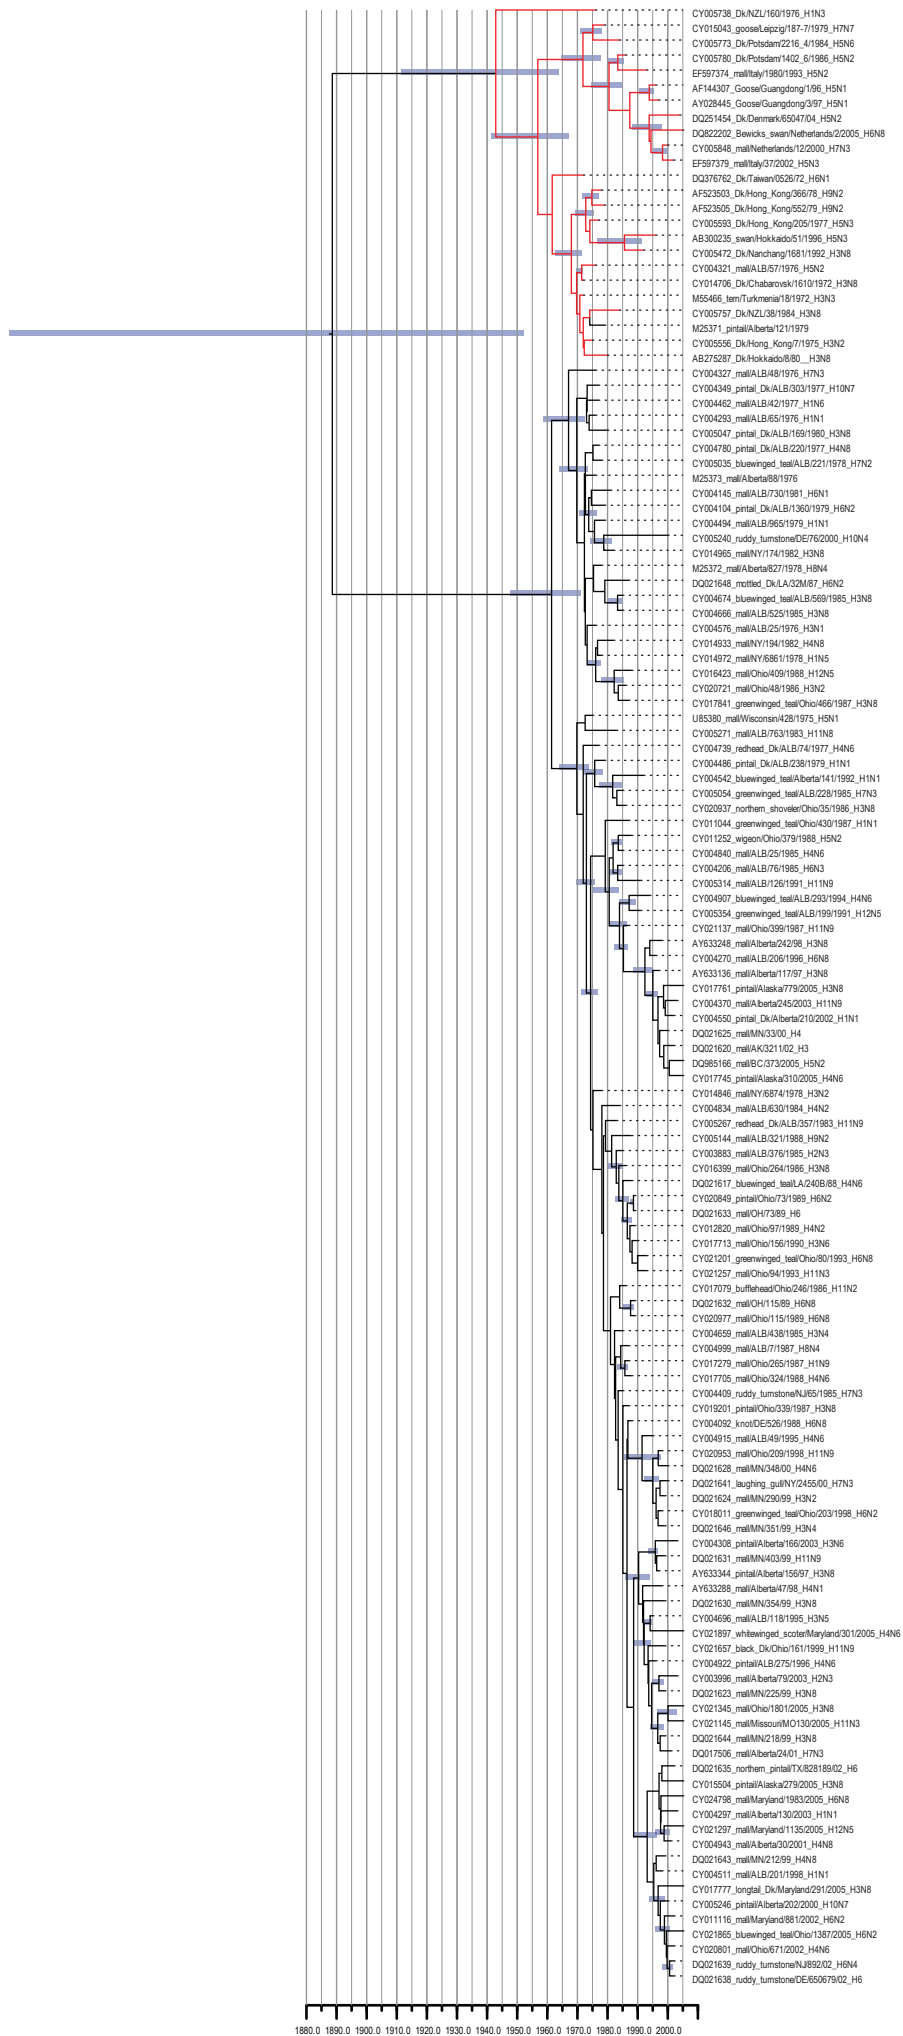

**Figure S8.** Dated phylogeny of the NS Allele B gene isolated from both Eurasia (red) and North America (black) Node bars indicate 95% HPD of divergence times. Scale bar shows timeline in years.
