# Supplementary material
Source: PubMed Central journal article supplement (PMC2753668)
Supplement: NIHMS116198-supplement-02.pdf [file NIHMS116198-supplement-02.pdf]

**TABLE S1. Bayes factor comparisons of generalized coalescent models for H4 and H6 viruses from the North American gene pool**

| Dataset         | Null model<br>(H <sub>0</sub> )                 | - log Likelihood<br>(95% HPD)       | Alternative model (H <sub>1</sub> ) |                      |                      |
|-----------------|-------------------------------------------------|-------------------------------------|-------------------------------------|----------------------|----------------------|
|                 |                                                 |                                     | Constant                            | Expansion            | Exponential          |
| H6              | <b>Constant</b><br><b>(Strong)</b> <sup>1</sup> | - 9521.497<br>(-9541.201; -9501.84) | -9541.837<br>± 0.364 <sup>2</sup>   | 5.8 <sup>3</sup>     | 6.1                  |
|                 | Expansion                                       | -9528.081<br>(-9548.169; -9508.855) |                                     | -9548.846<br>± 0.398 | 0.3                  |
|                 | Exponential                                     | -9528.041<br>(-9546.856; -9507.31)  |                                     |                      | -9548.501<br>± 0.403 |
| H6 lineage<br>A | <b>Constant</b><br><b>(Strong)</b>              | -4824.563<br>(-4836.73; -4813.123)  | -4836.026<br>± 0.247                | 0.416                | 5.728                |
|                 | <b>Expansion</b><br><b>(Strong)</b>             | -4824.642<br>(-4837.14; -4813.266)  |                                     | -4838.890<br>± 0.245 | 5.312                |
|                 | Exponential                                     | -4827.551<br>(-4839.336; -4815.882) |                                     |                      | -4836.234<br>± 0.225 |
| H6 lineage<br>B | Constant                                        | -4952.56<br>(-4968.847; -4936.281)  | -4969.414<br>± 0.327                | -0.830               | 0.878                |
|                 | Expansion                                       | -4952.017<br>(-4969.139; -4936.457) |                                     | -4969.853<br>± 0.295 | 1.708                |
|                 | Exponential                                     | -4953.365<br>(-4969.491; -4937.661) |                                     |                      | -4968.999<br>± 0.286 |
| H4              | <b>Constant</b>                                 | -10140<br>(-10150; -10120)          | -10155.57<br>± 0.362                | 2.486                | 1.796                |
|                 | Expansion                                       | -10140<br>(-10160; -10120)          |                                     | -10156.81<br>± 0.412 | -0.688               |
|                 | Exponential                                     | -10140<br>(-10150; -10120)          |                                     |                      | -10156.47<br>± 0.421 |

<sup>1</sup> Bold model names indicate which coalescent model fits the data in the comparison. Evidence against H<sub>0</sub> is assessed in the following way:  $2 \leq 2 \times \text{Bayes factor} \leq 6$  indicates positive evidence for the null model;  $6 \leq 2 \times \text{Bayes factor} \leq 10$  indicates strong evidence for the null model;  $2 \times \text{Bayes factor} > 10$  indicates very strong evidence for the null model.

<sup>2</sup> Bayes factors were estimated comparing the approximate marginal likelihoods of different models. Bayes factor is the difference (in log<sub>e</sub> space) of the marginal likelihood of null (H<sub>0</sub>) and the alternative (H<sub>1</sub>) coalescent model. Numbers shown are  $2 \times \text{Bayes factor}$

<sup>3</sup> Marginal likelihoods are contained in diagonal boxes of each dataset comparison (i.e. constant vs. constant). Marginal likelihoods were calculated using the harmonic mean of the sampled likelihoods.
